# Supplementary material
Source: PubMed Central journal article supplement (PMC7085458)
Supplement: NIHMS1549984-supplement-1.pdf [file NIHMS1549984-supplement-1.pdf]

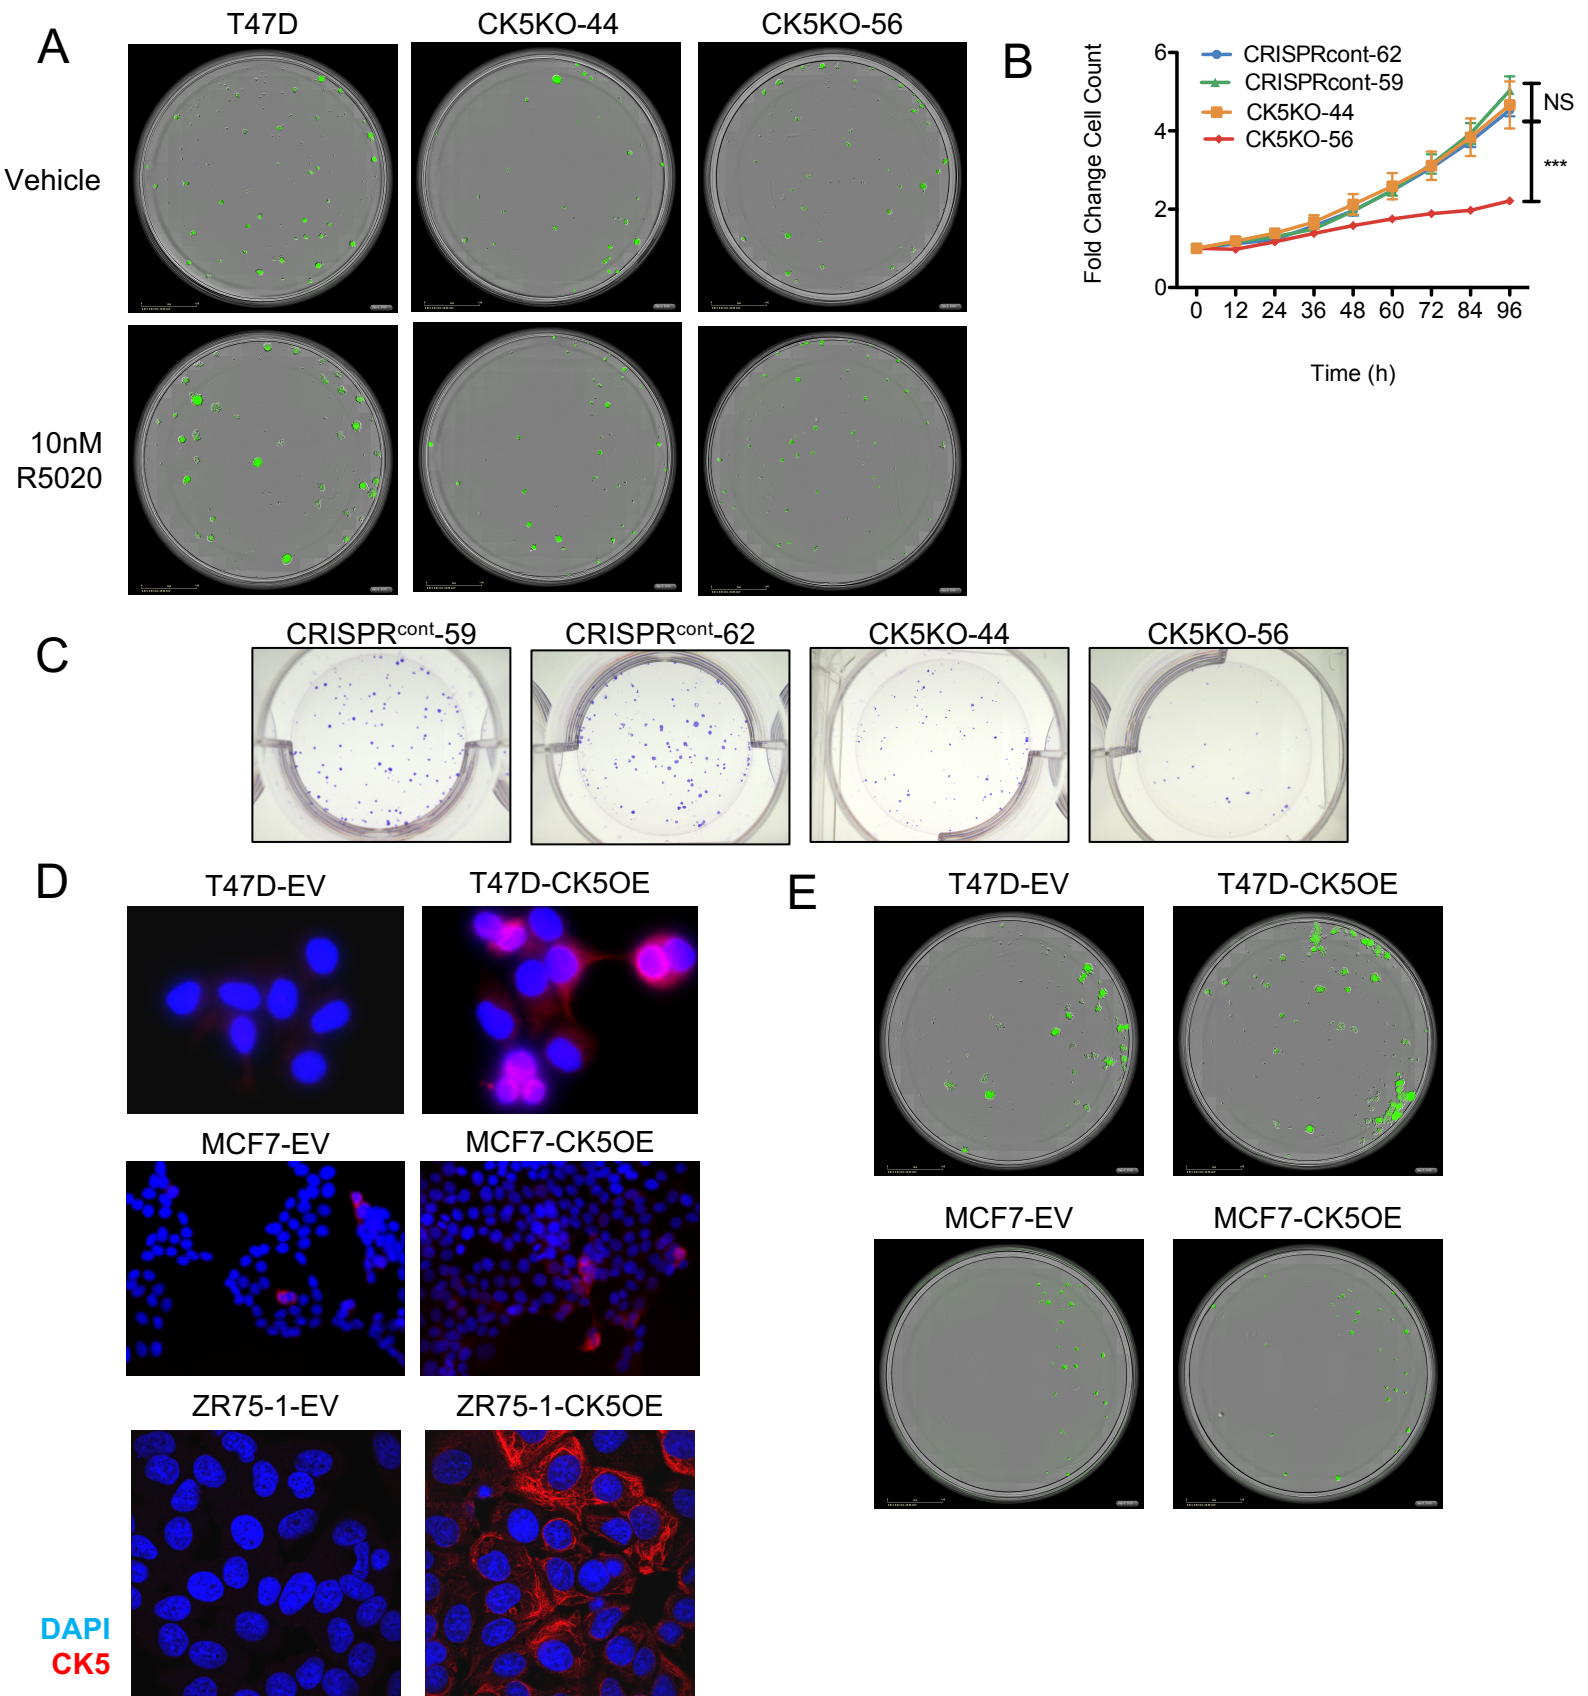

**Supplemental Figure 1.** **A.** Representative images of tumorsphere assay using T47D CRISPR<sup>cont</sup> and CK5KO cells stably expressing ZsGreen analyzed in Figure 1B. **B.** Nuclear-GFP labeled CRISPR<sup>cont</sup> and CK5KO T47D cells were seeded in phenol red-free media at 1000 cells/well in a 96 well plate in replicates of 6. Proliferation was assessed by measuring nuclear-GFP count using Incucyte Zoom. Fold change in cell count normalized to 0h timepoint is shown. Two-way ANOVA with Bonferroni post-tests were used to determine statistical significance. \*\*\* $P < 0.001$ . **C.** Representative images of colony formation assays using T47D CRISPR<sup>cont</sup> and CK5KO cells analyzed in Figure 1C. **D.** EV and CK5OE T47D, MCF7, and ZR75-1 cells without hormone treatment were analyzed by fluorescent immunocytochemistry for CK5 (red) and DAPI (blue). **E.** Representative images of tumorsphere assay using T47D (top) and MCF7 (bottom) EV and CK5OE cells analyzed in Figure 1E.

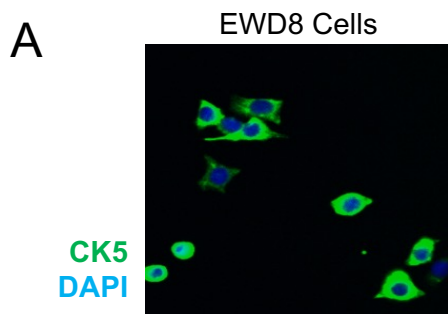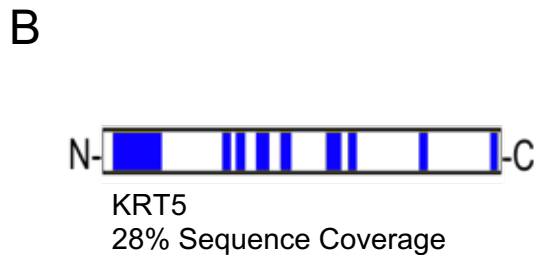

**C**

| Common cytokeratin interacting proteins identified by IP-MS |                        |      |             |
|-------------------------------------------------------------|------------------------|------|-------------|
|                                                             | Average Spectral Count |      |             |
|                                                             | CK5                    | IgG  | Fold Change |
| KRT5                                                        | 40                     | 23.5 | 1.7         |
| KRT18                                                       | 35.5                   | 7    | 5.1         |
| KRT8                                                        | 30                     | 14   | 2.1         |
| KRT17                                                       | 8.5                    | 1    | 8.5         |
| KRT19                                                       | 6.5                    | 0    | 6.5         |
| ITA3                                                        | 19                     | 5.5  | 3.5         |
| ITA6                                                        | 30                     | 13   | 2.3         |
| PKP3                                                        | 10                     | 5.5  | 1.8         |
| PLEC                                                        | 8.5                    | 1.5  | 5.7         |

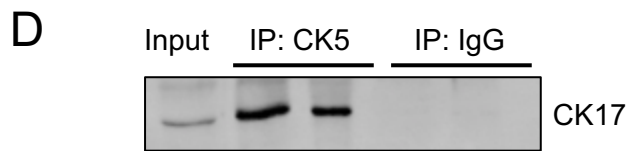

**E**

| Significantly differentially regulated Wnt/ $\beta$ -catenin pathway genes in EWD8 cells compared to parental T47D cells |                                                     |                        |
|--------------------------------------------------------------------------------------------------------------------------|-----------------------------------------------------|------------------------|
| Gene Symbol                                                                                                              | Gene Name                                           | Expression Fold Change |
| AKT3                                                                                                                     | AKT serine/threonine kinase 3                       | 6.808                  |
| AXIN2                                                                                                                    | axin 2                                              | 5.018                  |
| CDH2                                                                                                                     | cadherin 2                                          | 6.566                  |
| CDH3                                                                                                                     | cadherin 3                                          | 8.066                  |
| CDKN2A                                                                                                                   | cyclin dependent kinase inhibitor 2A                | 5.071                  |
| DKK1                                                                                                                     | dickkopf WNT signaling pathway inhibitor 1          | 6.284                  |
| FZD8                                                                                                                     | frizzled class receptor 8                           | 8.04                   |
| GJA1                                                                                                                     | gap junction protein alpha 1                        | 128.321                |
| KREMEN2                                                                                                                  | kringle containing transmembrane protein 2          | 4.895                  |
| MYC                                                                                                                      | v-myc avian myelocytomatosis viral oncogene homolog | 2.735                  |
| PPP2R2B                                                                                                                  | protein phosphatase 2 regulatory subunit Bbeta      | 55.215                 |
| SOX15                                                                                                                    | SRY-box 15                                          | 3.131                  |
| TGFB2                                                                                                                    | transforming growth factor beta 2                   | 5.071                  |
| TGFBR3                                                                                                                   | transforming growth factor beta receptor 3          | 5.783                  |
| TP53                                                                                                                     | tumor protein p53                                   | 2.286                  |
| WNT10A                                                                                                                   | Wnt family member 10A                               | 3.055                  |
| WNT3A                                                                                                                    | Wnt family member 3A                                | 3.877                  |
| WNT5A                                                                                                                    | Wnt family member 5A                                | 35.448                 |
| WNT7A                                                                                                                    | Wnt family member 7A                                | 10.281                 |

**Supplemental Figure 2.** **A.** ICC staining of CK5 (green) and DAPI (blue) shows abundant CK5 in EWD8 cells. **B.** Sequence coverage obtained for CK5 in EWD8 IP-MS experiment was generated by Scaffold. **C.** Table shows average spectral counts of keratins and desmosomal components pulled down in EWD8 IP-MS experiment. Fold change of CK5 spectral counts over IgG spectral counts are shown. **D.** Co-IP was performed in untreated EWD8 cells using a CK5 antibody and IgG negative control and was analyzed by immunoblot for CK17 expression to confirm the interaction between CK5 and CK17. **E.** Table shows Wnt/ $\beta$ -catenin pathway genes that are differentially expressed in EWD8 cells compared to parental T47D cells.

**A**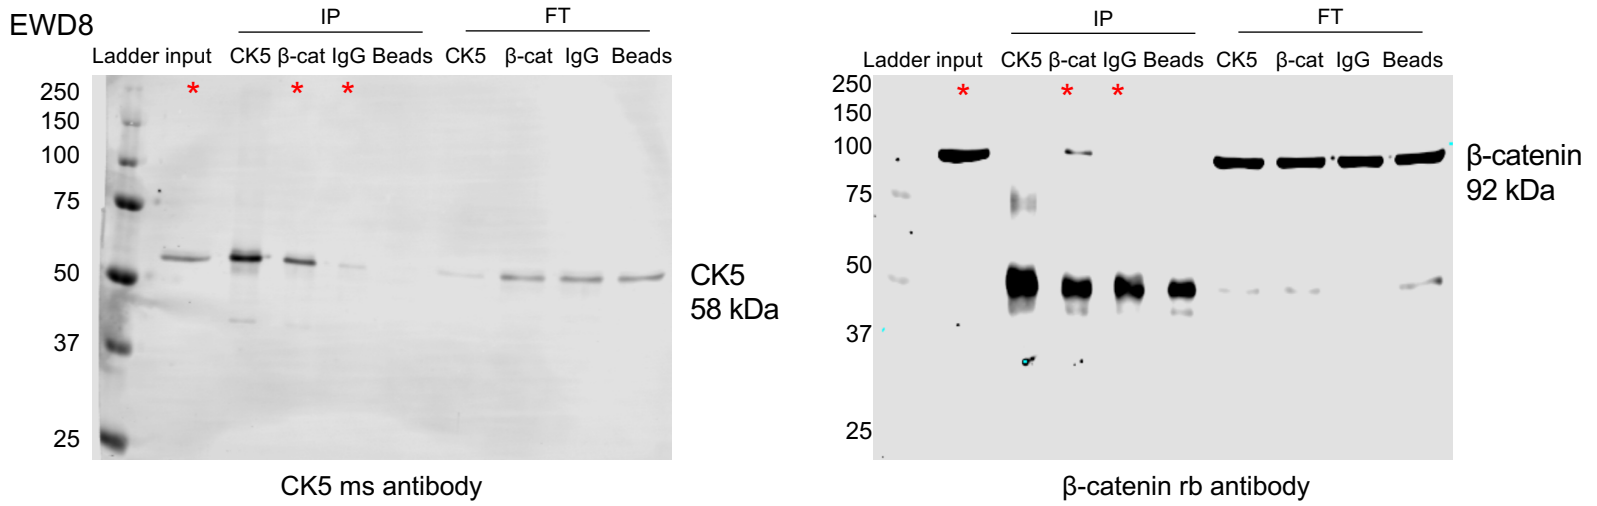**B**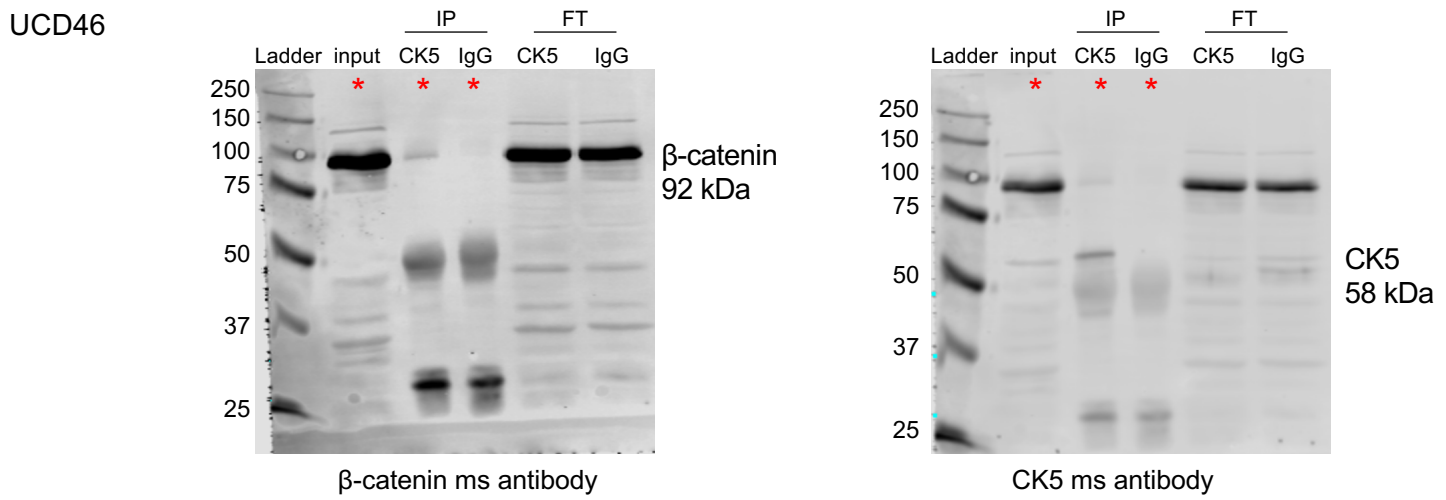**C**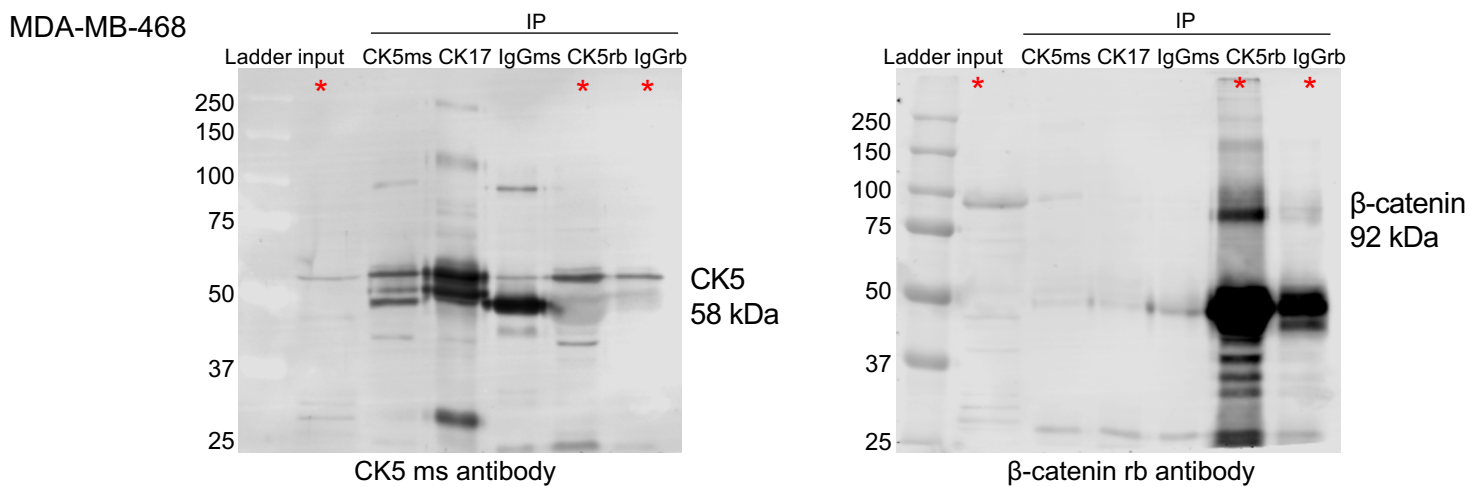

**Supplemental Figure 3.** Full blots are shown for co-IP experiments from Figure 2E for EWD8 (**A**), UCD46 (**B**), and MDA-MB-468 (**C**). Red asterisks indicate the lanes used in Figure 2E.

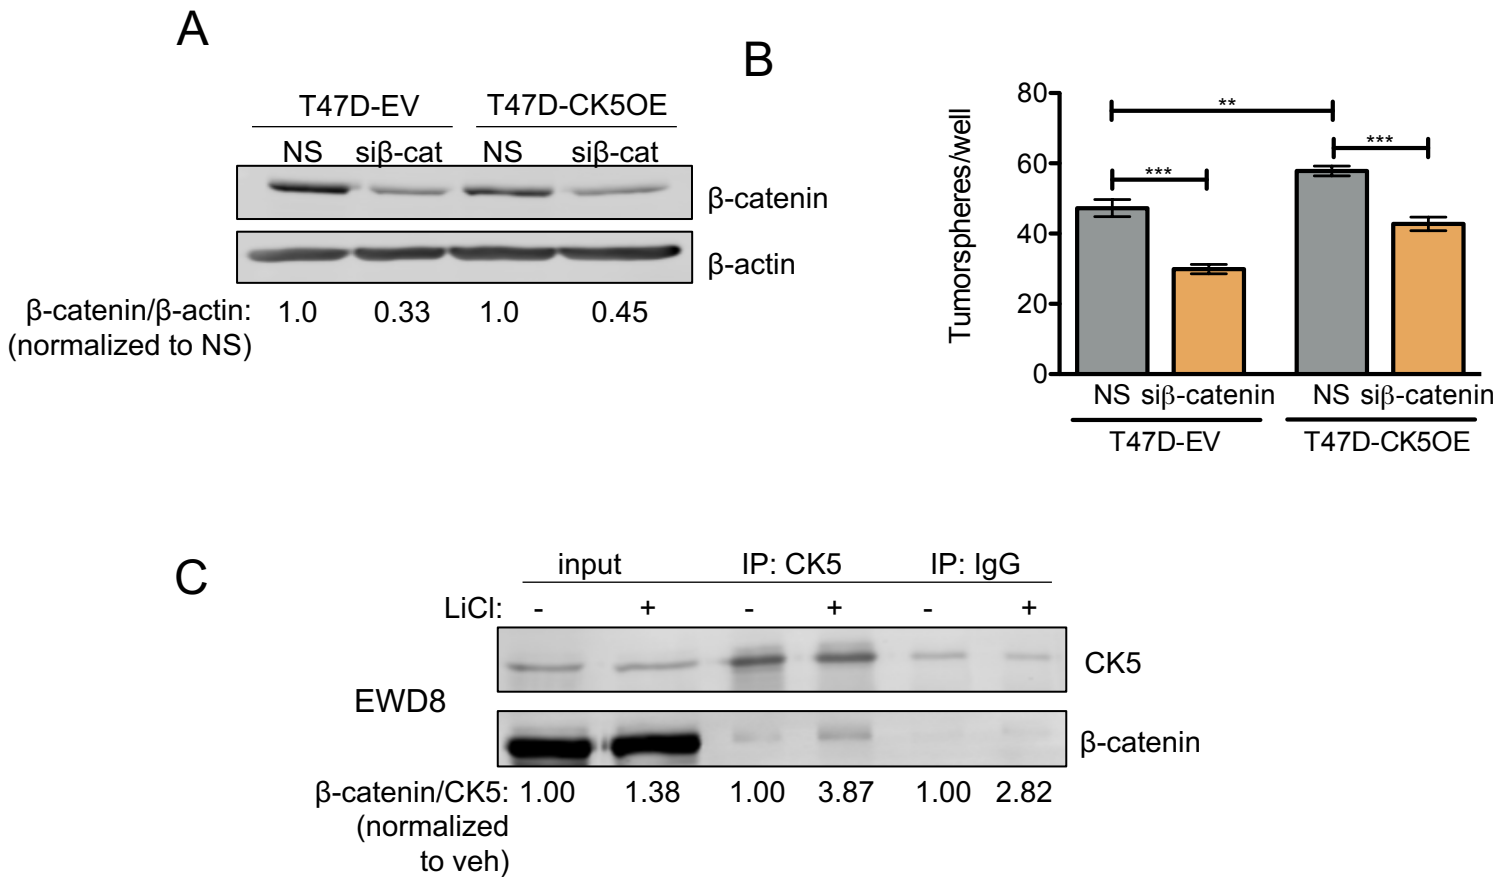

**Supplemental Figure 4. A.** β-catenin knockdown was performed in T47D-EV and CK5OE cells using 10nM siRNA for 48h. Knockdown was validated by immunoblot for β-catenin by comparing to nonsilencing siRNA transfected control (NS). Experiment was repeated twice. **B.** β-catenin knockdown was performed as described. 48h after transfection, cells were trypsinized, counted and re-plated into a tumorsphere formation assay. Tumorsphere assay was repeated 3 times, error bars represent SEM, ANOVA/Tukey was used to determine statistical significance. \*\* $P < 0.01$ , \*\*\* $P < 0.001$ . **C.** EWD8 cells were treated with 50mM LiCl for 24h, lysates were harvested, and a co-IP was performed with CK5 and IgG antibodies and analyzed by immunoblot for CK5 and β-catenin pull-down. Co-IP was repeated twice.

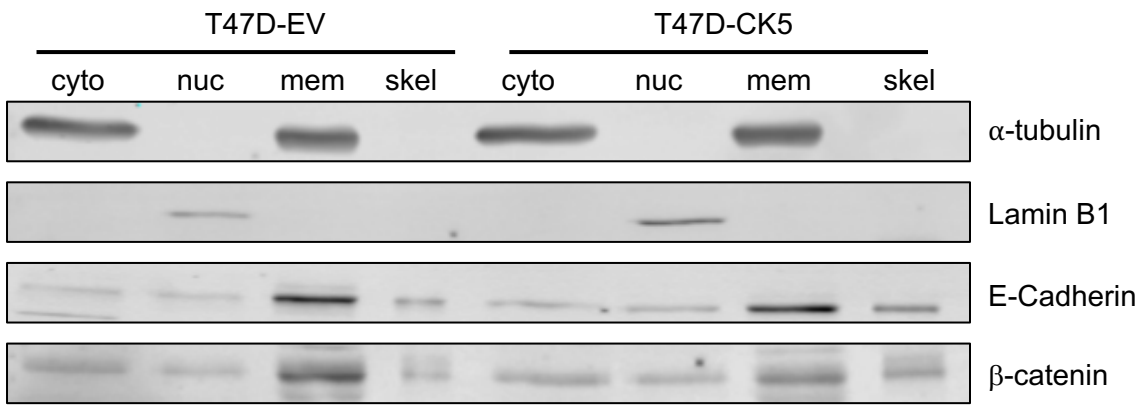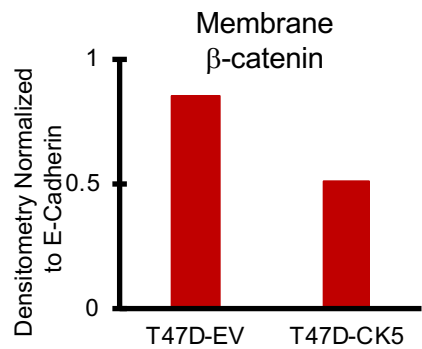

**Supplemental Figure 5.** Subcellular fractionation was performed in T47D-EV and T47D-CK5 cells. SDS-PAGE was performed with cytoplasmic (cyto), nuclear (nuc), membrane (mem), and cytoskeletal (skel) fractions and an immunoblot was performed with antibodies against alpha-tubulin (cytoplasmic control), Lamin B1 (nuclear control), E-cadherin (membrane control), and  $\beta$ -catenin. Membrane  $\beta$ -catenin was quantified using densitometry and normalizing to E-cadherin.

| ER, PR, and CK5 status in cell line and PDX models |            |    |            |                |
|----------------------------------------------------|------------|----|------------|----------------|
|                                                    | Model      | ER | PR         | CK5            |
| Cell Lines                                         | T47D       | +  | +          | – (+ with P4#) |
|                                                    | MCF7       | +  | + with E2& | – (+ with P4#) |
|                                                    | ZR75-1     | +  | + with E2& | – (+ with P4#) |
|                                                    | EWD8       | –  | –          | +              |
|                                                    | MDA-MB-468 | –  | –          | +              |
| PDX models                                         | UCD46      | +  | –          | high           |
|                                                    | UCD15      | +  | –          | low            |

&E2 refers to 17 $\beta$ -estradiol treatment

#P4 refers to progesterone or R5020 treatment

**Supplemental Figure 6.** Table outlines ER, PR, and CK5 expression in the cell lines and PDX models used in the study.
